# Supplementary material for: ZEB1 and oncogenic Ras constitute a regulatory switch for stimulus‐dependent E‐cadherin downregulation
Source: PubMed Central journal article supplement — Cancer Sci. 2020 Nov 9;112(1):205–16. doi: 10.1111/cas.14701 (PMC7780036; doi:10.1111/cas.14701), 2020-11-09
Supplement: CAS-112-205-s002.pdf [file CAS-112-205-s002.pdf]

Table S1. Antibodies used in this study

| antibody                                   | source/type       | catalog number | manufacturer                                         | dilution |        |
|--------------------------------------------|-------------------|----------------|------------------------------------------------------|----------|--------|
|                                            |                   |                |                                                      | WB       | IF     |
| Primary antibodies                         |                   |                |                                                      |          |        |
| anti-E-cadherin                            | mouse monoclonal  | 610182         | BD Biosciences (San Jose, CA)                        | 1:1000   | 1:2000 |
| anti-N-cadherin                            | mouse monoclonal  | 610920         | BD Biosciences                                       | 1:1000   |        |
| anti-Snail                                 | rat monoclonal    | #4719          | Cell Signaling (Danvers, MA)                         | 1:1000   |        |
| anti-phospho-ERK1/2                        | rabbit polyclonal | #9101          | Cell Signaling                                       | 1:1000   |        |
| anti-Ras                                   | rabbit monoclonal | ab108602       | Abcam (Cambridge, UK)                                | 1:1000   |        |
| anti-ZEB1                                  | rabbit polyclonal | NBP1-05987     | Novus Biologicals (Centennial, CO)                   | 1:1000   |        |
| anti- $\alpha$ -tubulin                    | mouse monoclonal  | T9026          | Sigma-Aldrich (St. Louis, MO)                        | 1:1000   |        |
| anti-HA                                    | rat monoclonal    | 12158167001    | Sigma-Aldrich (Roche)                                |          | 1:500  |
| anti-GFP                                   | rabbit polyclonal | 598            | Medical & Biological Laboratories (Nagoya, Japan)    |          | 1:2000 |
| Secondary antibodies                       |                   |                |                                                      |          |        |
| HRP-conjugated anti-rabbit IgG             | goat polyclonal   | 111-035-003    | Jackson ImmunoResearch Laboratories (West Grove, PA) | 1:10000  |        |
| HRP-conjugated anti-mouse IgG              | goat polyclonal   | 115-035-003    | Jackson ImmunoResearch Laboratories                  | 1:10000  |        |
| HRP-conjugated anti-rat IgG                | goat polyclonal   | 112-035-003    | Jackson ImmunoResearch Laboratories                  | 1:10000  |        |
| Alexa Fluor 594-conjugated anti-mouse IgG  | goat polyclonal   | A-11005        | Invitrogen (Waltham, MA)                             |          | 1:1000 |
| Alexa Fluor 488-conjugated anti-rabbit IgG | goat polyclonal   | A-11008        | Invitrogen                                           |          | 1:1000 |
| Alexa Fluor 488-conjugated anti-rat IgG    | donkey polyclonal | A-21208        | Invitrogen                                           |          | 1:500  |

Table S2. Primers used for quantitative real-time PCR and conventional RT-PCR

quantitative real-time PCR

| Human gene   |   | Sequence                |
|--------------|---|-------------------------|
| <i>GAPDH</i> | F | CGACCACTTTGTCAAGCTCA    |
|              | R | CCCTGTTGCTGTAGCCAAAT    |
| <i>CDH1</i>  | F | TGCACCAACCCTCATGAGTG    |
|              | R | GTCAGTATCAGCCGCTTTCAG   |
| <i>ZEB1</i>  | F | CAATGATCAGCCTCAATCTGCA  |
|              | R | CCATTGGTGGTTGATCCCA     |
| <i>SNAI1</i> | F | TTCTCACTGCCATGGAATTCC   |
|              | R | GCAGAGGACACAGAACCAGAAA  |
| <i>EPCAM</i> | F | CGCAGCTCAGGAAGAATGTG    |
|              | R | TGAAGTACACTGGCATTGACGA  |
| <i>ESRP2</i> | F | TGCCACAGAGGATGACTTTG    |
|              | R | ATTGACTGCTGGGCTCTTTG    |
| <i>HPRT1</i> | F | GGAAAGAATGTCTTGATTGTGGA |
|              | R | GCTTGCGACCTTGACCATCT    |

conventional RT-PCR

| Human gene   |   | Sequence              |
|--------------|---|-----------------------|
| <i>CDH1</i>  | F | AGCGTGTGTGACTGTGAAGG  |
|              | R | GTCAGTATCAGCCGCTTTCAG |
| <i>HPRT1</i> | F | GGGAGGCCATCACATTGTAG  |
|              | R | GCTTGCGACCTTGACCATCT  |

Table S3. FPKM values of core EMT-TFs in PANC-1 cells (GSM2884282)

| Gene          | PANC-1_FPKM |
|---------------|-------------|
| <i>ZEB1</i>   | 2.40        |
| <i>ZEB2</i>   | 0           |
| <i>SNAI1</i>  | 4.58        |
| <i>SNAI2</i>  | 0.774       |
| <i>TWIST1</i> | 0.0839      |
